# Supplementary material for: Obesity Is Associated with the Severity of Periodontal Inflammation Due to a Specific Signature of Subgingival Microbiota
Source: MDPI journal article supplement (doi:10.3390/ijms242015123), 2023-10-12
Supplement: s1 [file s1]

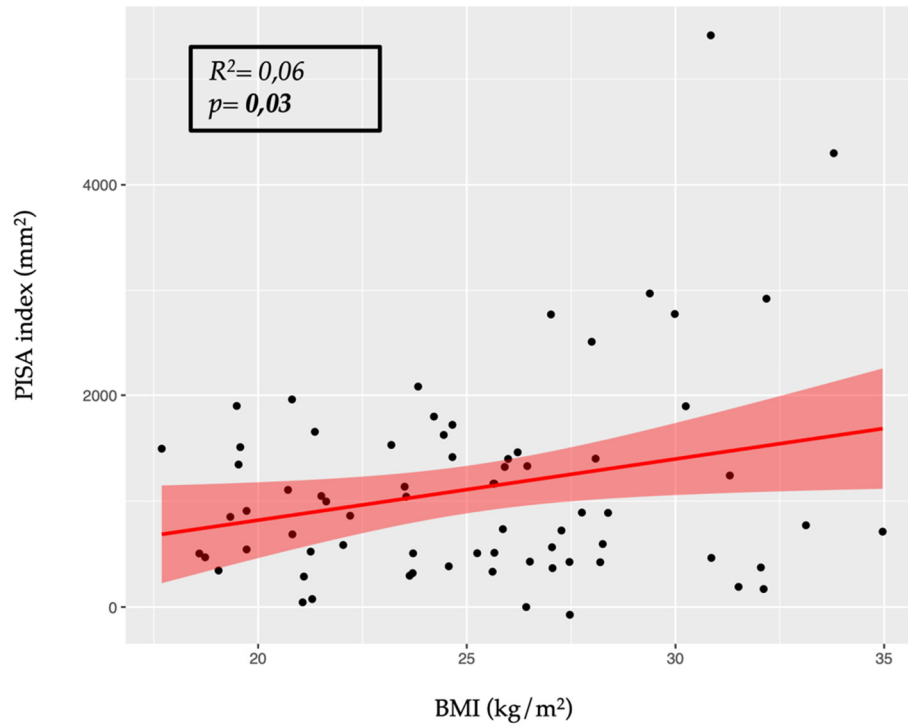

**Figure S1.** Pearson's correlation analysis between PISA index and BMI. We observed a correlation between local inflammatory surface, represented by the PISA index, and BMI. In order to avoid two distinct groups, we took advantage of the epidemiological data of overweight patients to obtain the distribution of local inflammation depending on BMI.

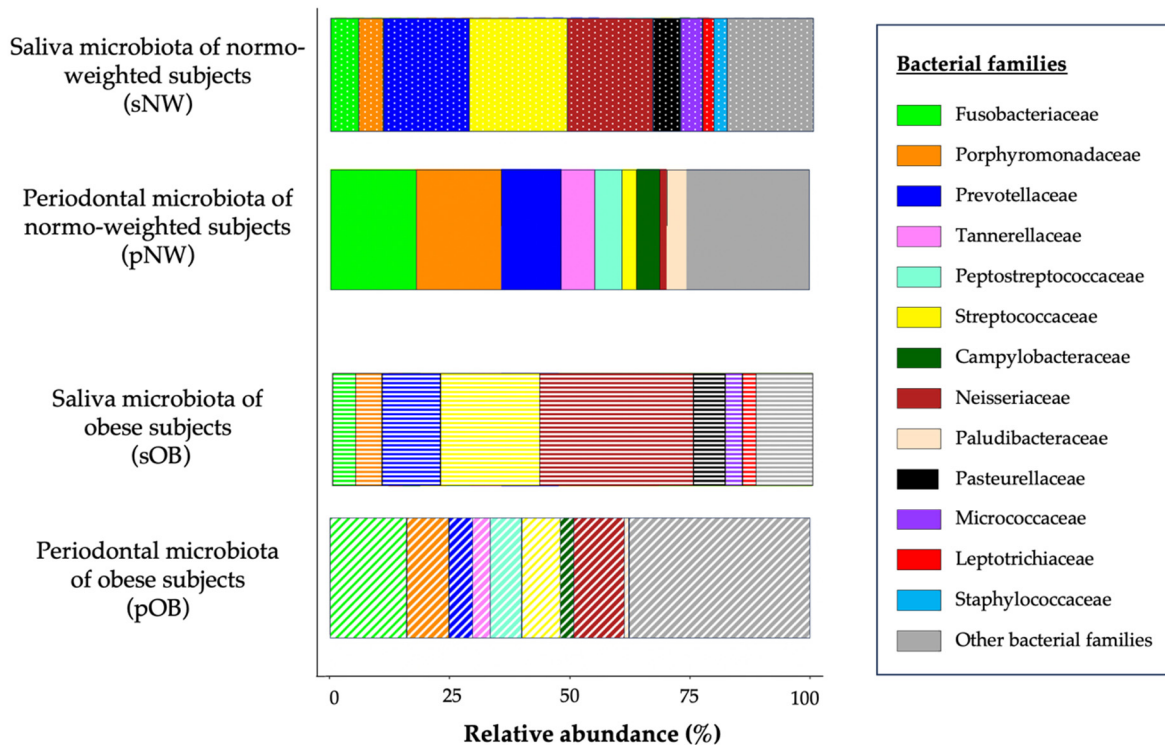

**Figure S2.** Top 10 relative abundances (%) for taxonomic families in salivary and periodontal microbiota of obese and normo-weighted subjects.

■ pNW  
■ pOB

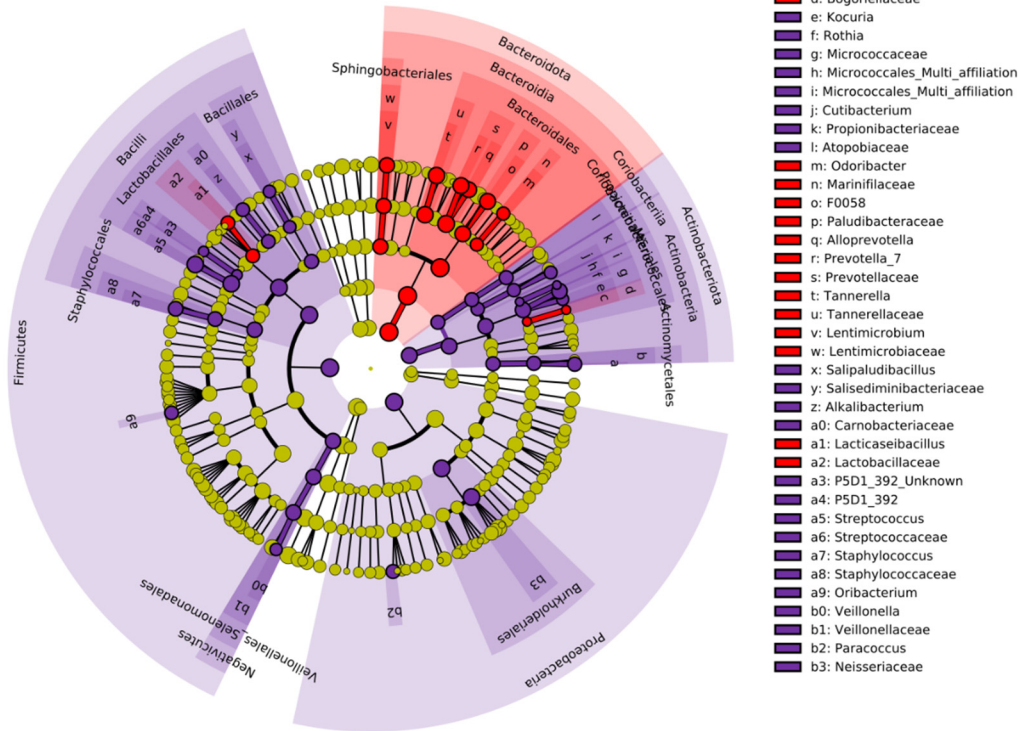

**Figure S3.** Linear discriminant analysis effect size (LEfSe) analysis-based cladogram for periodontal microbiota of obese and normo-weighted subjects

■ pNW  
■ sNW

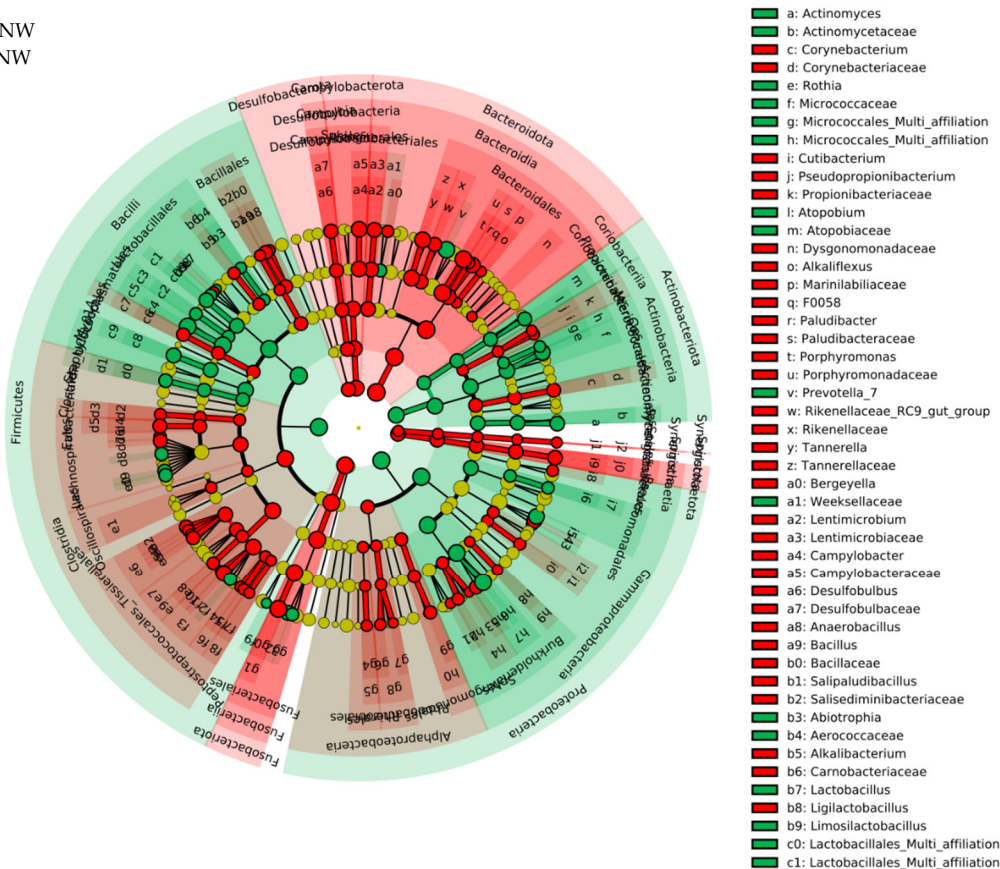

**Figure S4.** Linear discriminant analysis effect size (LEfSe) analysis-based cladogram of periodontal and salivary microbiota in normo-weighted subjects.

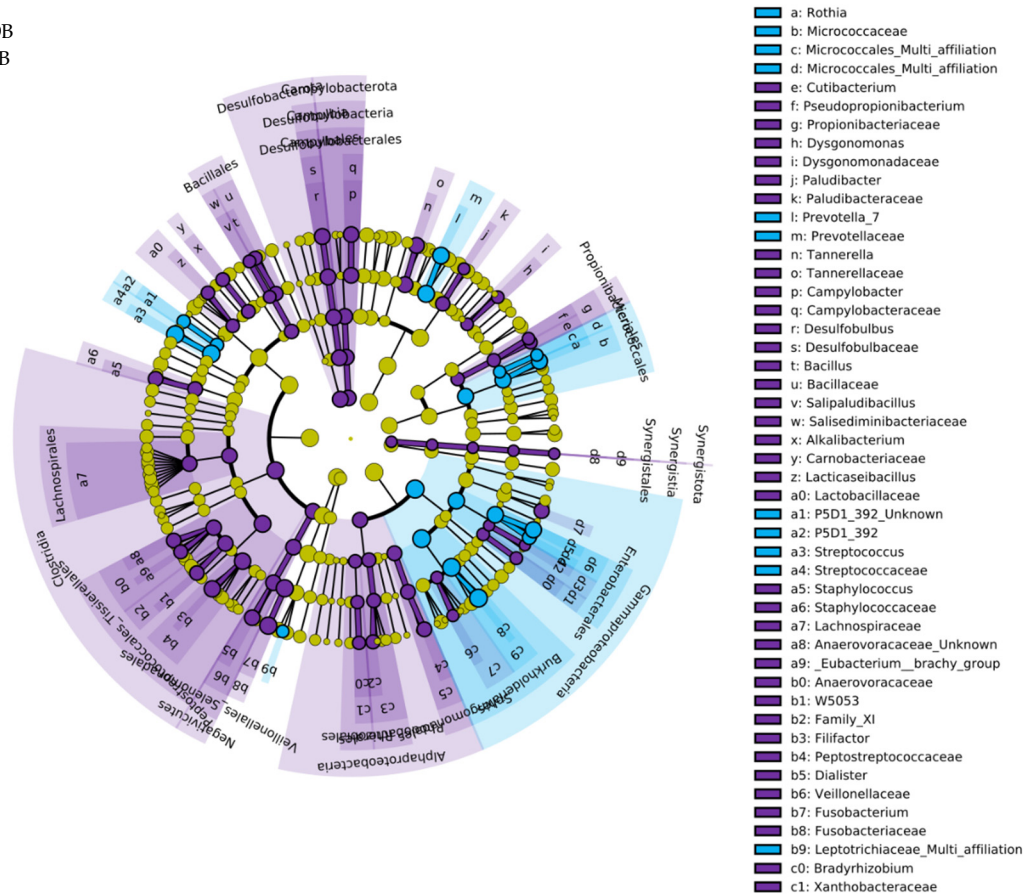

**Figure S5.** Linear discriminant analysis effect size (LEfSe) analysis-based cladogram of periodontal and salivary microbiota in obese subjects.

| Relative abundance of Staphylococcaceae |                              |                              |                              | p-value                                                                |
|-----------------------------------------|------------------------------|------------------------------|------------------------------|------------------------------------------------------------------------|
| Periodontal microbiota                  |                              | Salivary microbiota          |                              |                                                                        |
| pNW (n = 34)                            | pOB (n = 11)                 | sNW (n = 34)                 | sOB (n = 11)                 |                                                                        |
| 0                                       | 5,54917240202491             | 0                            | 0                            |                                                                        |
| 0                                       | 2,20167958748987             | 0                            | 0,04770739                   |                                                                        |
| 0,0017690974065032                      | 1,30684174153421             | 0                            | 0                            |                                                                        |
| 0,0059349529160402                      | 0,0507283136459164           | 42,4307036                   | 0                            |                                                                        |
| 0,00132329394328362                     | 0,178422205659823            | 0                            | 0                            |                                                                        |
| 0                                       | 2,12809286223399             | 0                            | 0                            |                                                                        |
| 1,68074563988388                        | 0,953972020984262            | 0                            | 0                            |                                                                        |
| 0,00077210537694184<br>5                | 0,113687659873272            | 0                            | 0                            |                                                                        |
| 1,7507311405793                         | 0                            | 11,1088317                   | 0                            |                                                                        |
| 0,625988490317779                       | 0                            | 20,4362078                   | 0,00525127                   |                                                                        |
| 0                                       | 0                            | 0                            |                              |                                                                        |
| 0,003180358108323                       |                              | 0                            |                              |                                                                        |
| 0,00135987815491732                     |                              | 0                            |                              |                                                                        |
| 0                                       |                              | 0                            |                              |                                                                        |
| 0                                       |                              | 0                            |                              |                                                                        |
| 0                                       |                              | 0                            |                              |                                                                        |
| 0                                       |                              | 0                            |                              |                                                                        |
| 0,0873871249635887                      |                              | 0                            |                              |                                                                        |
| 0                                       |                              | 0                            |                              |                                                                        |
| 11,5166551030563                        |                              | 0                            |                              |                                                                        |
| 0,792546967790361                       |                              | 0                            |                              |                                                                        |
| 0                                       |                              | 0                            |                              |                                                                        |
| 0                                       |                              | 0                            |                              |                                                                        |
| 0                                       |                              | 20,4362078                   |                              |                                                                        |
|                                         |                              | 0                            |                              |                                                                        |
| 0,00177604120415594                     |                              | 0                            |                              |                                                                        |
| 0,0039714058776807                      |                              | 0                            |                              |                                                                        |
| 0                                       |                              | 0                            |                              |                                                                        |
| 0                                       |                              | 0                            |                              |                                                                        |
| 0                                       |                              | 0                            |                              |                                                                        |
| 0                                       |                              | 0,00549843                   |                              |                                                                        |
| 0                                       |                              | 0                            |                              |                                                                        |
| 0                                       |                              | 15,423589                    |                              |                                                                        |
| 0                                       |                              | 0                            |                              |                                                                        |
| 0                                       |                              | 0                            |                              |                                                                        |
| <b>Mean ± SD</b>                        | 0,484533576 ±<br>1,996730174 | 1,134781527 ±<br>1,693212834 | 2,629695849 ±<br>8,428264644 | 0,004814424 ±<br>0,014312952<br><b>pNW vs.<br/>pOB<br/>* p = 0,006</b> |
| <b>Ratio<br/>Perio/Saliva</b>           | <b>-4,427272695</b>          | <b>0,9957574</b>             |                              |                                                                        |

**Table S1.** Relative abundance of Staphylococcaceae in periodontal microbiota.

| Relative abundance of Flavobacteriaceae |                             |                              |                              | p-value                               |
|-----------------------------------------|-----------------------------|------------------------------|------------------------------|---------------------------------------|
| Periodontal microbiota                  |                             | Salivary microbiota          |                              |                                       |
| pNW (n = 34)                            | pOB (n = 11)                | sNW (n = 34)                 | sOB (n = 11)                 |                                       |
| 0,00077715777857220<br>6                | 0                           | 0,260704692684468            | 1,45                         |                                       |
| 0,308523562887653                       | 0                           | 0,730273141122914            | 0,01060164325470<br>45       |                                       |
| 12,5004422743516                        | 2,28956461644782            | 0,246347751360642            | 1,09434895511314             |                                       |
| 1,29381973569676                        | 0,0710196391042829          | 0,0147048011175649           | 0,92430433936563<br>5        |                                       |
| 0,919689290582117                       | 0,185197732457032           | 0,212862026704509            | 0,24791231732776<br>6        |                                       |
| 0,087830584561335                       | 3,50269829956216            | 0,281728853157425            | 0                            |                                       |
| 0,178988496714906                       | 0,0780664501623782          | 0,207845044885685            | 6,58859470468432             |                                       |
| 6,56289570400568                        | 2,12328423586846            | 0,176645593157307            | 3,20090572251955             |                                       |
| 0,0480749969953127                      | 5,36531813510231            | 0                            | 1,11051502145923             |                                       |
| 0                                       | 0,425408996612484           | 0                            | 3,05624113847608             |                                       |
| 1,23046711790758                        | 1,61754855994642            | 1,2126627521062              | 0,14116887831242<br>7        |                                       |
| 7,69964698024998                        |                             | 0,578679125079635            |                              |                                       |
| 0,0720735422106179                      |                             | 1,01419878296146             |                              |                                       |
| 0,152296885684093                       |                             | 0,028169014084507            |                              |                                       |
| 0                                       |                             | 0,313686643552914            |                              |                                       |
| 0,36246476037052                        |                             | 2,24211629970159             |                              |                                       |
| 2,39599276471407                        |                             | 3,19783573806881             |                              |                                       |
| 0,0606855034469366                      |                             | 0                            |                              |                                       |
| 1,56167045648058                        |                             | 0,495635449030922            |                              |                                       |
| 0                                       |                             | 0,8                          |                              |                                       |
| 0                                       |                             | 0                            |                              |                                       |
| 0,20995597697257                        |                             | 0,978574371652246            |                              |                                       |
| 1,41497045305319                        |                             | 0,342625759227535            |                              |                                       |
| 0,234279823821573                       |                             | 0,420066631258751            |                              |                                       |
| 0,43690613622236                        |                             | 12,1785894347656             |                              |                                       |
| 0,631453534551231                       |                             | 0,0558174150334904           |                              |                                       |
| 0,062439295129735                       |                             | 1,34044393196887             |                              |                                       |
| 5,31077024756974                        |                             | 0,257450460290217            |                              |                                       |
| 0,301309905166672                       |                             | 0,789714450811383            |                              |                                       |
| 0,0753078763178878                      |                             | 0,197943586077968            |                              |                                       |
| 0,180813318777293                       |                             | 2,01454659620114             |                              |                                       |
| 0,607889442840899                       |                             | 1,37857900318134             |                              |                                       |
| 0,682790391576176                       |                             | 0,53194210014833             |                              |                                       |
| 2,84802739086452                        |                             | 1,26008778139601             |                              |                                       |
| <b>Mean ± SD</b>                        | 1,467674352 ±<br>2,73873931 | 1,423464242 ±<br>1,770878136 | 0,992955213 ±<br>2,105828083 | <b>pNW vs.<br/>pOB p =<br/>0,8307</b> |
| <b>Ratio<br/>Perio/Saliva</b>           | <b>0,323449911</b>          | <b>-0,138361943</b>          |                              |                                       |

**Table S2.** Relative abundance of Flavobacteriaceae in periodontal microbiota.
